# Supplementary material for: Morphology optimization of perovskite films for efficient sky-blue light emitting diodes via a novel green anti-solvent dimethyl carbonate
Source: Royal Society of Chemistry journal article supplement (doi:10.1039/d1tc01805a), 2021-01-01
Supplement: d1tc01805a1.pdf [file d1tc01805a1.pdf]

## Electronic Supplementary Information

### Morphology Optimization of Perovskite Films for Efficient Sky-Blue Light Emitting Diodes via a novel Green Anti-Solvent Dimethyl Carbonate

*Yong-Wen Zhang, Zheng-Liang Diao, Ji-Yang Chen, Wan-Yi Tan,\* Yan-Nan Qian, Lian-Gang Xiao  
and Yonggang Min\**

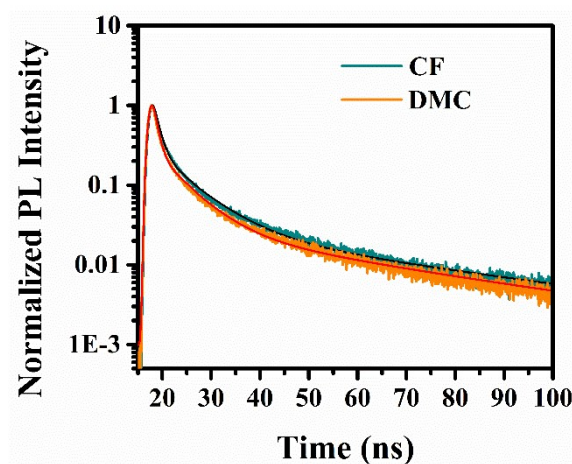

**Fig. S1** Time-resolved photoluminescence spectra of the CF-treated and the DMC-treated perovskite films on the quartz/PEDOT:PSS substrates, excited at 316 nm and probed at 490 nm.

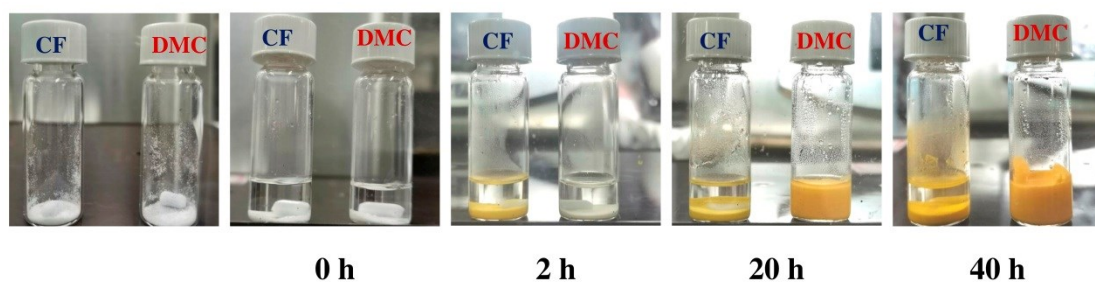

**Fig. S2** The powder of  $\text{PbBr}_2$  and  $\text{CsBr}$  in CF and DMC after stirred for a period of time.

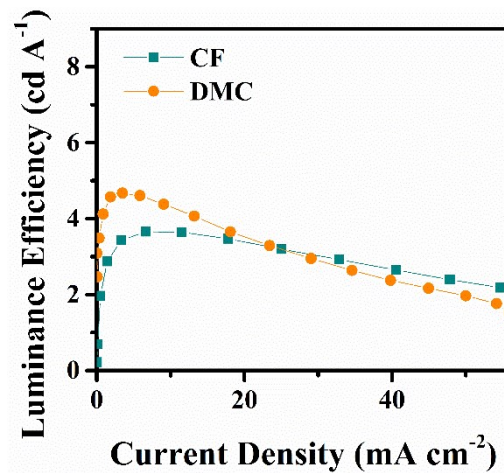

**Fig. S3** LE- $J$  of sky-blue PeLEDs treated by CF and DMC.

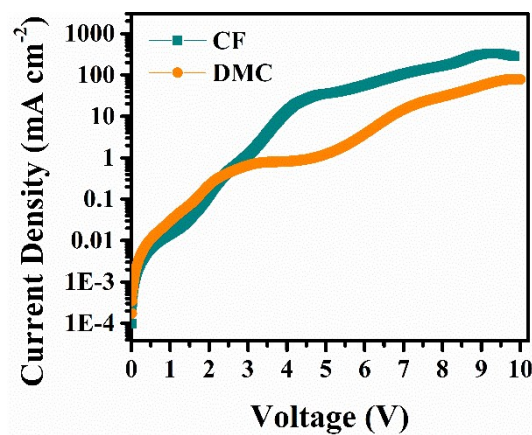

**Fig. S4**  $J$ - $V$  characteristics of the hole-only devices (ITO/PEDOT:PSS/Perovskite/Poly-TPD/Ag) treated by CF and DMC.

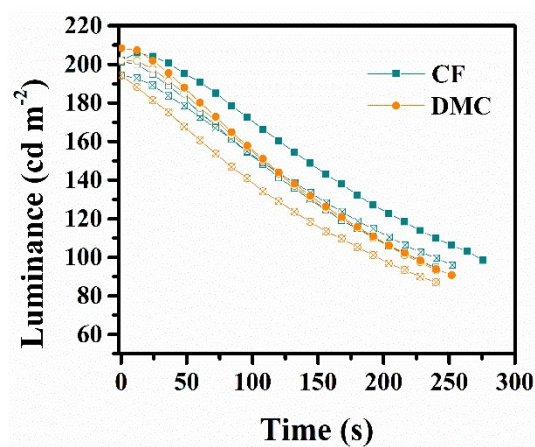

**Fig. S5** Luminance decay characteristics of the sky-blue PeLEDs treated by CF (three devices) and DMC (three devices).

**Table S1** Time-resolved photoluminescence characterization of the perovskite films treated by CF and DMC.

| Perovskite  | $\tau_1$ (ns) | Fraction 1 | $\tau_2$ (ns) | Fraction 2 | $\tau_3$ (ns) | Fraction 3 |
|-------------|---------------|------------|---------------|------------|---------------|------------|
| CF-treated  | 7.4           | 36.66      | 45.7          | 25.91      | 1.2           | 37.43      |
| DMC-treated | 6.1           | 35.78      | 40.4          | 26.08      | 0.9           | 38.14      |
